# Supplementary material for: Enhancement of X-ray detection by single-walled carbon nanotube enriched flexible polymer composite
Source: PubMed Central journal article supplement (PMC4493992; doi:10.1186/1556-276x-9-610), 2014-11-12
Supplement: 11671_2014_2482_MOESM1_ESM.pdf [file 11671_2014_2482_MOESM1_ESM.pdf]

# Enhancement of X-ray Detection by Single-Wall Carbon Nanotubes Enriched Flexible Polymer Composite

Heetak Han,<sup>1</sup> Sanggeun Lee,<sup>1</sup> Jungmok Seo,<sup>1</sup> Chandreswar Mahata,<sup>1</sup> Sung Hwan Cho,<sup>2</sup> A-Reum Han,<sup>3</sup>  
Keun-Sung Hong,<sup>3</sup> Joon-Ho Park,<sup>3</sup> Myung-Jin Soh,<sup>3</sup> Cheolmin Park,<sup>2</sup> and Taeyoon Lee<sup>1\*</sup>

(1) Nanobio Device Laboratory, School of Electrical and Electronic Engineering, Yonsei University, 50  
Yonsei-ro, Seodaemun-Gu, Seoul 120-749, Republic of Korea

(2) Nano-Polymers Laboratory, Department of Materials Science and Engineering, Yonsei University, 50  
Yonsei-ro, Seodaemun-Gu, Seoul 120-749, Republic of Korea

(3) Luxen Technologies, Inc., 396 Worldcupbuk-ro, Mapo-Gu, Seoul 121-795, Republic of Korea

\* Corresponding author:

Tel: +82-2-2123-5767

Fax: +82-2-313-2879

e-mail address: taeyoon.lee@yonsei.ac.kr

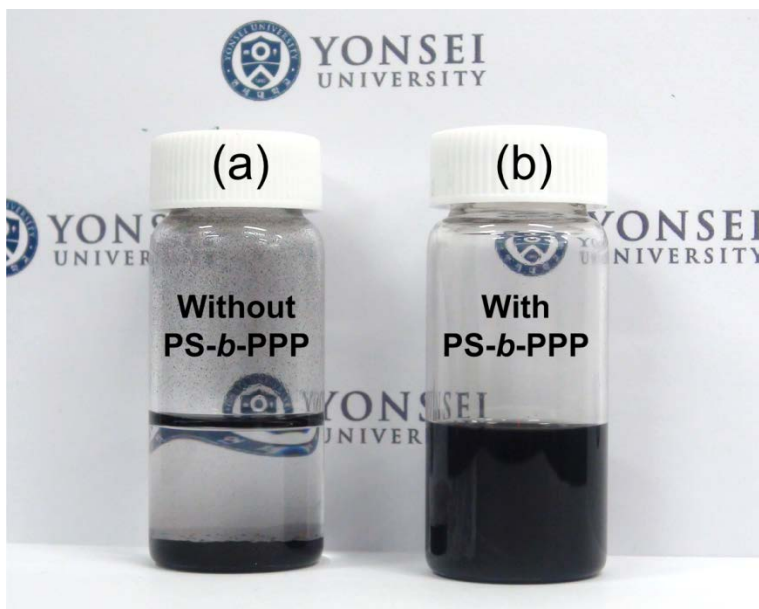

**Figure S1 Photograph of 0.1 mg/mL of SWNT dispersion toluene solutions.** SWNT dispersion solutions (a) without and (b) with PS-*b*-PPP dispersant

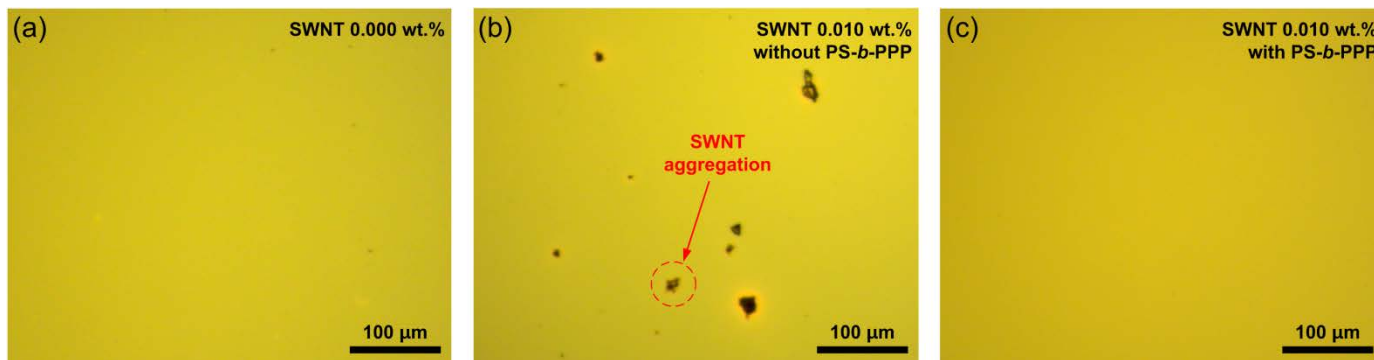

**Figure S2 Optical microscope images of SWNTs enriched polymer composite films.** The composite films (a) without SWNT, (b) with 0.010 wt.% SWNT, and (c) with 0.010 wt.% SWNT and PS-b-PPP dispersant. The SWNTs formed large aggregates and bundles in the composite films without dispersant. In contrast, there were no significant aggregations of SWNTs on the composite films with PS-b-PPP dispersant.

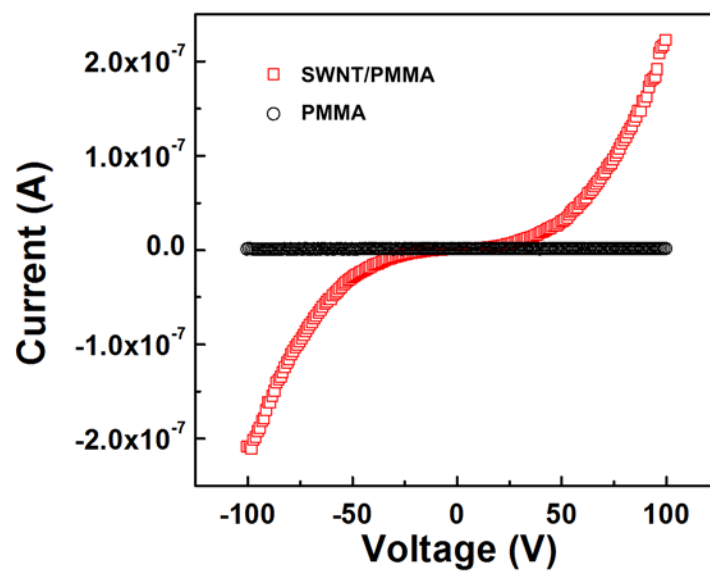

**Figure S3** *I-V* characteristics of PMMA and SWNT/PMMA devices. SWNT/PMMA device (SWNT 0.1 wt.%) showed ambipolar characteristics.
